# Supplementary material
Source: PubMed Central journal article supplement (PMC5207321)

## Expanded View Figures

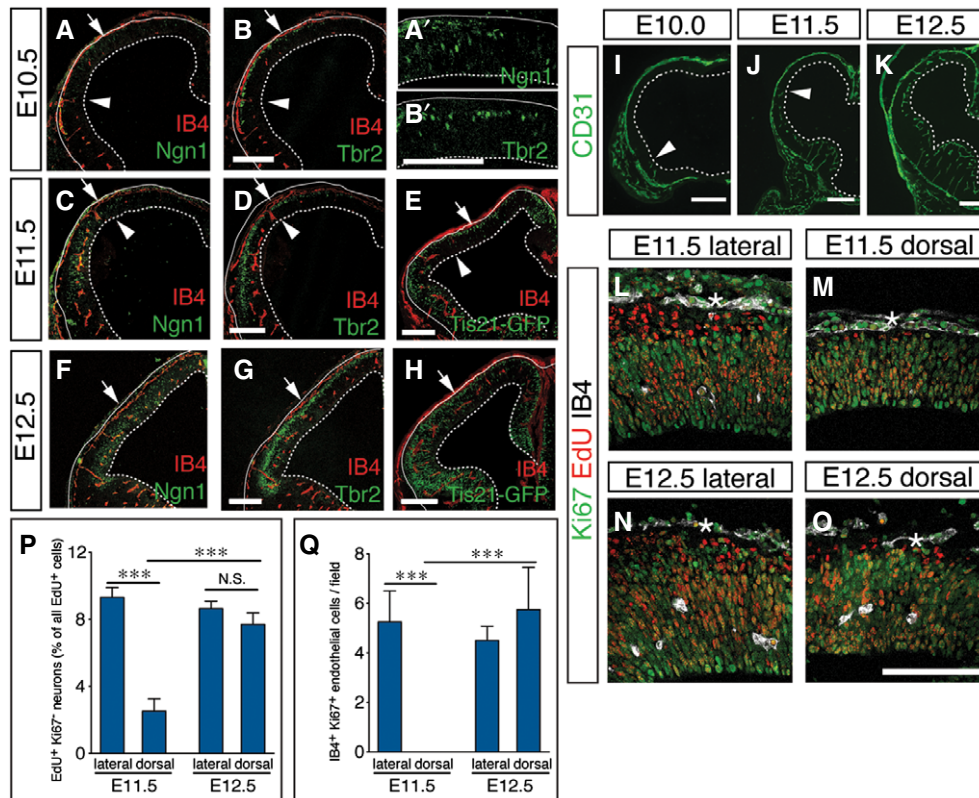

**Figure EV1. Congruence of angiogenesis and NSC differentiation in the developing mouse cortex.**

A–H Staining for isolectin B4 (IB4)<sup>+</sup> blood vessels and Ngn1<sup>+</sup> neurogenic NPCs (A, A', C, F), Tbr2<sup>+</sup> BPs (B, B', D, G) and *Tis21*-GFP<sup>+</sup> (E, H) neurogenic NPCs of the mouse cortex at E10.5 (A–B), E11.5 (C–E), and E12.5 (F–H). Panels (A') and (B') show larger magnifications of the E10.5 cortex region above the vascular front. Arrows mark the border between lateral and dorsal cortex. Arrowheads in (A–E) denote the position of the vascular front.

I–K Immunostaining for CD31 in the cortex at E10.0 (I), E11.5 (J), and E12.5 (K). Arrowheads in (I) and (J) denote the position of the vascular front.

L–O Staining for Ki67 (green), EdU (red), and IB4 (white) in the lateral (L, N) and the dorsal (M, O) cortex at E11.5 (L, M) and E12.5 (N, O), showing a temporo-spatial relationship between the appearance of isolectin B4<sup>+</sup> blood vessels in the parenchyma of lateral cortex from E11.5 (M) to E12.5 (O) and the generation of Ki67<sup>-</sup> EdU<sup>+</sup> neurons. Asterisks indicate non-parenchymal, meningeal blood vessels.

P, Q Quantifications of the generation of Ki67<sup>-</sup> EdU<sup>+</sup> neurons (P) and the presence of IB4<sup>+</sup> Ki67<sup>+</sup> endothelial cells (Q) in the lateral and dorsal cortex shown in (L–M) (mean ± SEM; N = 4; \*\*\*P < 0.001).

Data information: Full and dotted lines indicate basal and apical boundaries of the cortex, respectively. N.S., not significant. Scale bars: 100 μm.

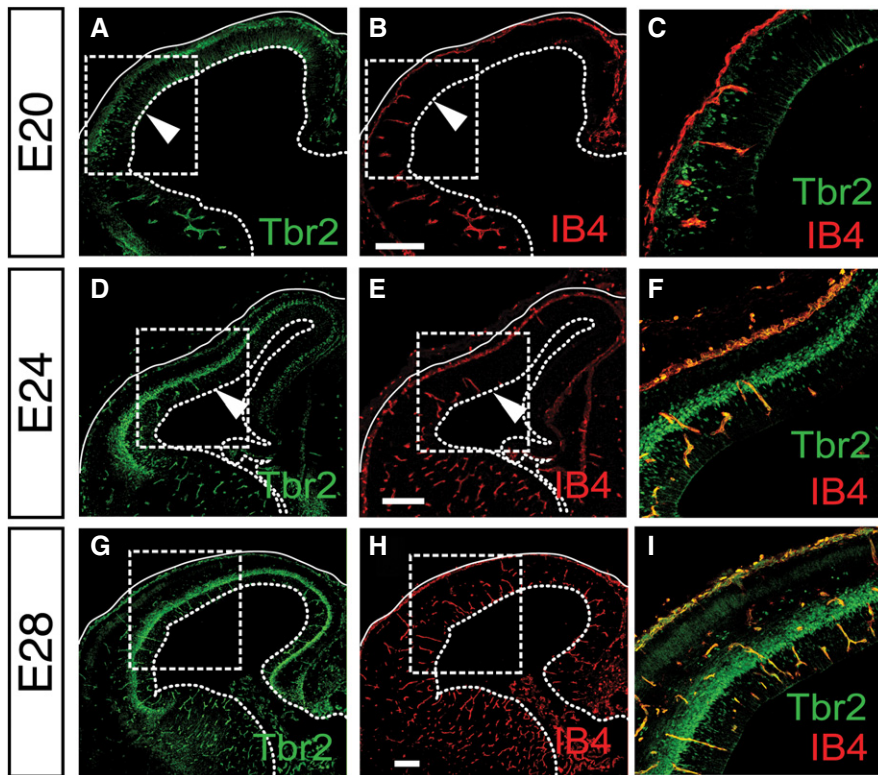

**Figure EV2. Congruence of angiogenesis and NSC differentiation in the developing gyrencephalic ferret cortex.**

A–I Stainings for Tbr2 (A, C, D, F, G, I) and isolectin B4 (IB4; B, C, E, F, H, I) in the ferret cortex at E20 (A–C), E24 (D–F) and E28 (G–I), showing induction of Tbr2<sup>+</sup> BPs specifically in the vascularized areas of the cortex. Panels (C, F, I) are merged magnifications of the boxed areas in (A) and (B), (D) and (E), or (G) and (H), respectively. Arrowheads in (A, B, D, E) denote the position of the vascular front. Full and dotted lines indicate basal and apical boundaries of the cortex, respectively. Scale bars: 200  $\mu$ m.

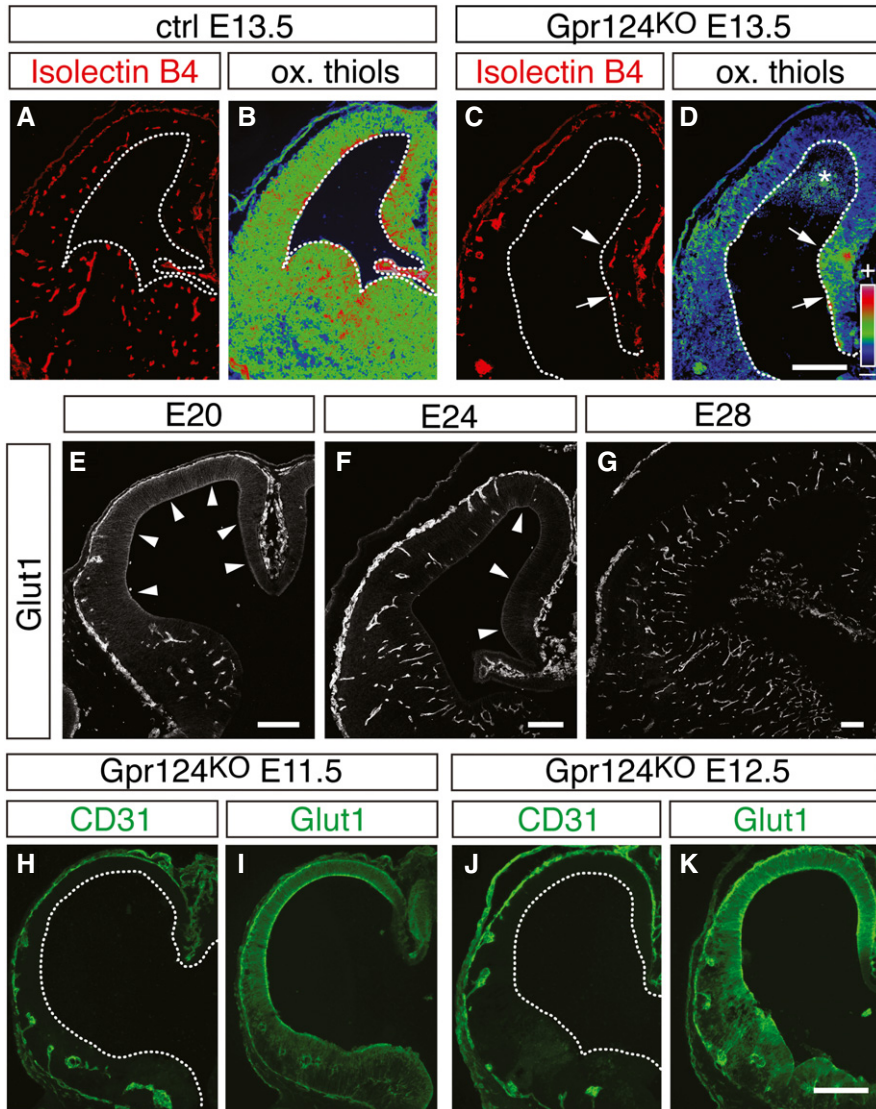

**Figure EV3. Regulation of tissue oxygenation and neuroepithelial Glut1 expression in the Gpr124<sup>KO</sup> mouse and ferret brain.**

A–D Stainings for isolectin B4 (A, C) and oxidized thiols (B, D) in E13.5 control (A, B) and Gpr124<sup>KO</sup> (C, D) cortices, showing reduced tissue oxygenation in the Gpr124<sup>KO</sup> neocortex containing abnormal vessels. Note the more normal tissue oxygenation levels in the Gpr124<sup>KO</sup> cortical hem containing normal vessels (C, D; arrows). The asterisk indicates hemorrhage of red blood in the mutant. Panels (B) and (D) are pseudocolor conversions of staining intensity (from low [purple] to high [red]).

E–G Immunostainings for Glut1 (white) in the developing ferret cortex at E20 (E), E24 (F), and E28 (G). Arrowheads point toward Glut1<sup>+</sup> tissue.

H–K Immunostainings for CD31 (H, J) and Glut1 (I, K) in Gpr124<sup>KO</sup> cortices, showing persistent high neuroepithelial Glut1 expression in the absence of functional CD31<sup>+</sup> blood vessels at E11.5 (H, I) and at E12.5 (J, K).

Data information: Dotted lines indicate the apical boundary of the forebrain. Scale bars: 200 μm.

**Figure EV4. Regulation of angiogenesis, cell survival, and hypoxia response element-dependent gene expression by HIF-1 $\alpha$ .**

A–D Stainings for TUNEL<sup>+</sup> apoptotic cells (A, C) and CD31<sup>+</sup> blood vessels (B, B', D, D') in E13.5 WT (A, B) and HIF-1 $\alpha$ <sup>CC-/-</sup> (C, D) cortices. (B') and (D') are magnifications of the boxed areas in (B) and (D), respectively. Dashed lines indicate the ventral border of the dorsal cortex, where Cre is active and HIF-1 $\alpha$  is deleted. The vascular area (% of total cortical area) is indicated (B, D; mean  $\pm$  SEM; N = 4; \*\*P < 0.01).

E, F Immunostaining for CD31<sup>+</sup> blood vessels in E13.5 WT (E) and HIF-1 $\alpha$ <sup>CC+/-</sup> (F) cortices. The vascular area (% of total cortical area) is indicated (mean  $\pm$  SEM; N = 4).

G Quantification of TUNEL<sup>+</sup> cells in the cortex of E13.5 WT and HIF-1 $\alpha$ <sup>CC+/-</sup> embryos, showing no significant changes of apoptosis (mean  $\pm$  SEM; N = 4).

H–M Immunostainings for the deep layer markers Tbr1 (H, I), and CtIp2 (J, K) and the upper layer marker Brn2 (L, M) in P5 WT (H, J, L) and HIF-1 $\alpha$ <sup>CC+/-</sup> (I, K, M) cortices.

N Quantification of Tbr1<sup>+</sup>, CtIp2<sup>+</sup>, or Brn2<sup>+</sup> neurons within a 250- $\mu$ m column of the cortex (mean  $\pm$  SEM; N = 4).

O Quantification of hypoxia response element (HRE)-dependent luciferase activity in Neuro2A cells after transfection of 9xHRE::luciferase together with EGFP (control), wild-type HIF-1 $\alpha$  (middle) or the transcriptionally impaired mutant HIF-1 $\alpha$ - $\Delta$ C (right). A representative experiment is shown (mean  $\pm$  SEM; N = 3; \*\*\*P < 0.001 compared to EGFP, ##P < 0.01 compared to native HIF-1 $\alpha$ ).

Data information: Full and dotted lines in (A–M) indicate basal and apical boundaries of the cortex, respectively. A.U., arbitrary units; and N.S., not significant. Scale bars: 200  $\mu$ m.

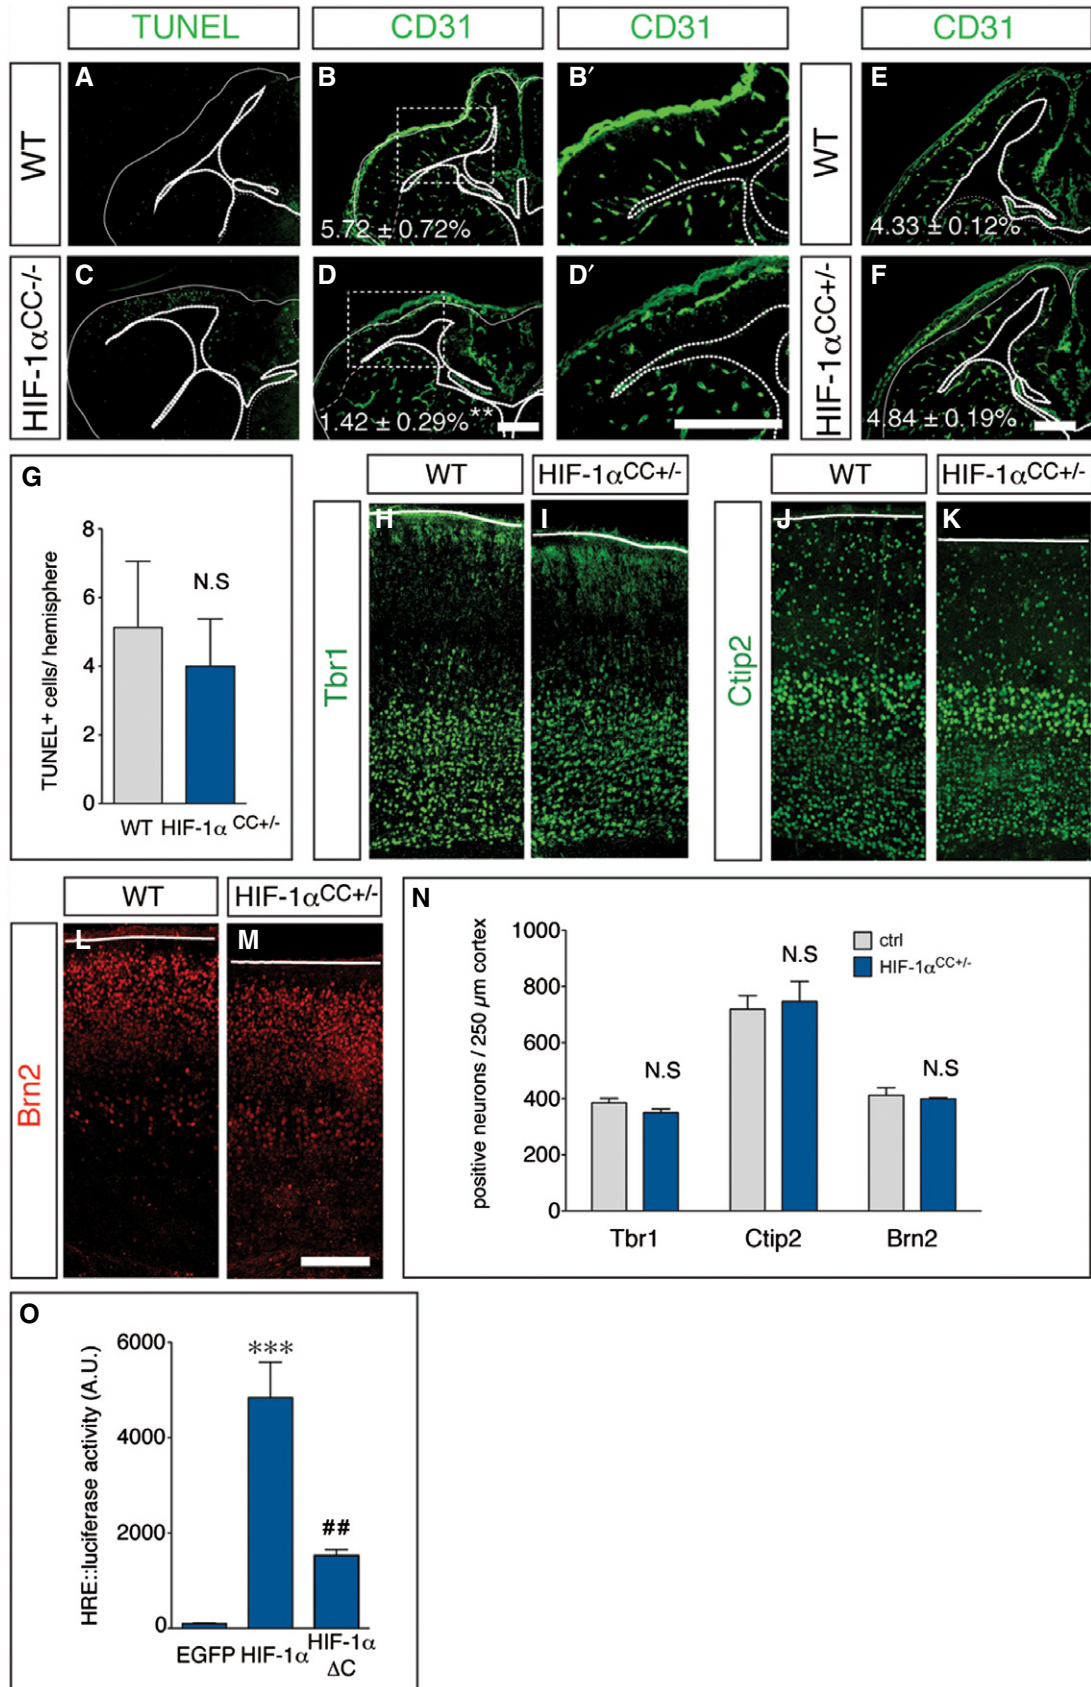

Figure EV4.

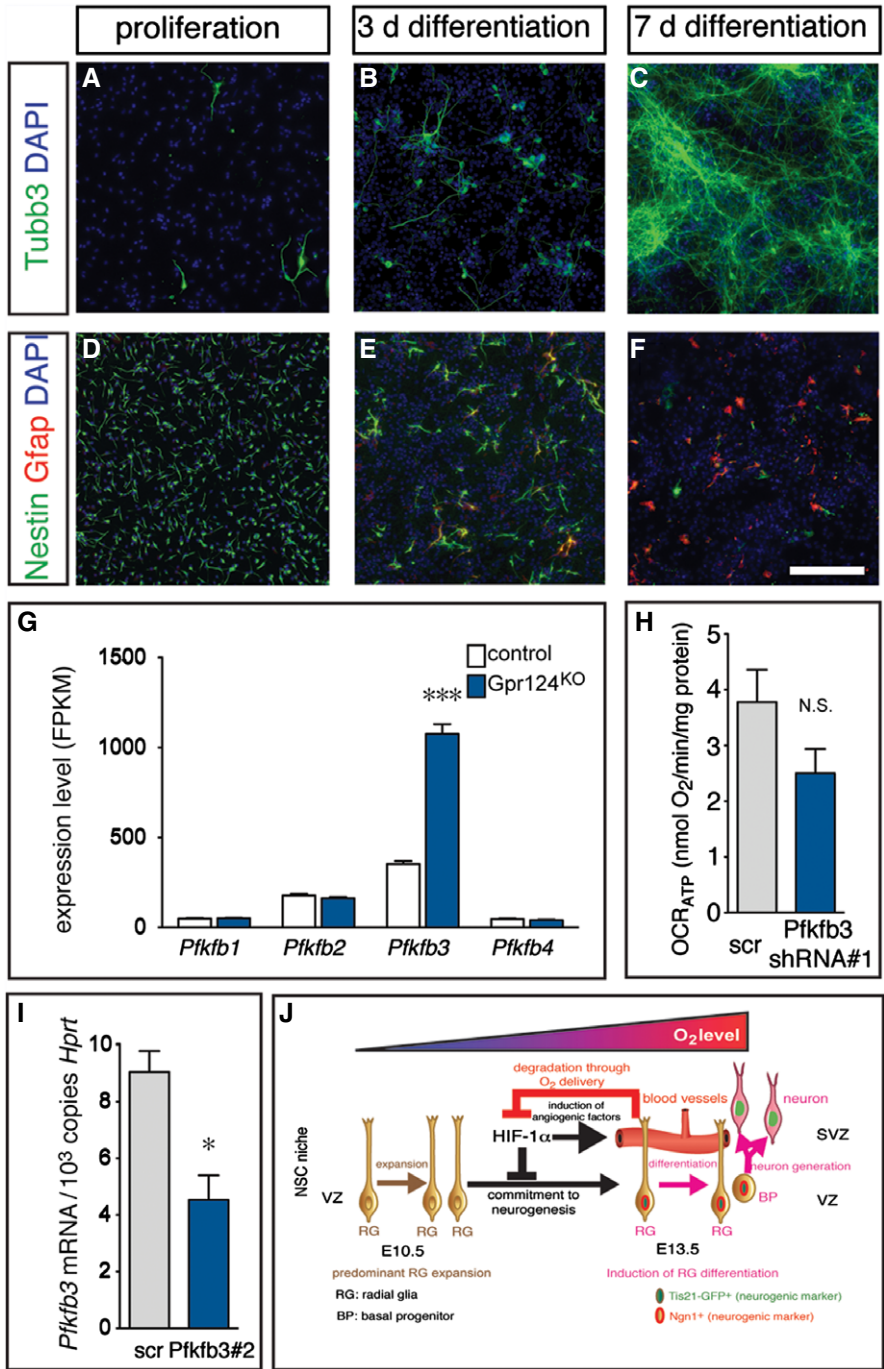

Supplement: EMBJ-35-924-s002.pdf [file EMBJ-35-924-s002.pdf]
