# Supplementary material
Source: PubMed Central journal article supplement (PMC5207321)
Supplement: EMBJ-35-924-s004.pdf [file EMBJ-35-924-s004.pdf]

# Lange et al., Figure 3

## Uncropped Western Blot Images

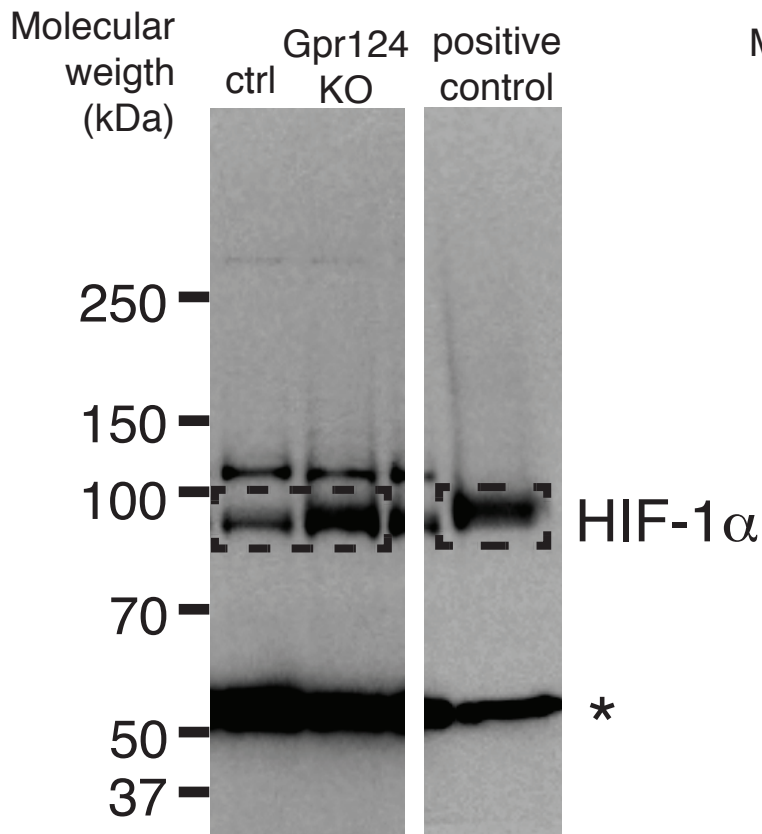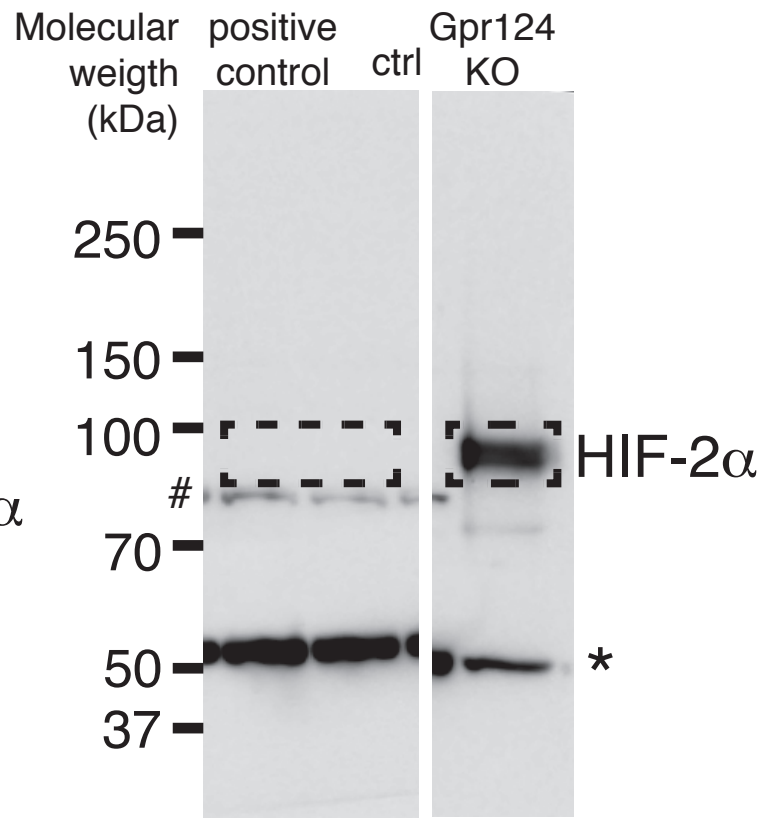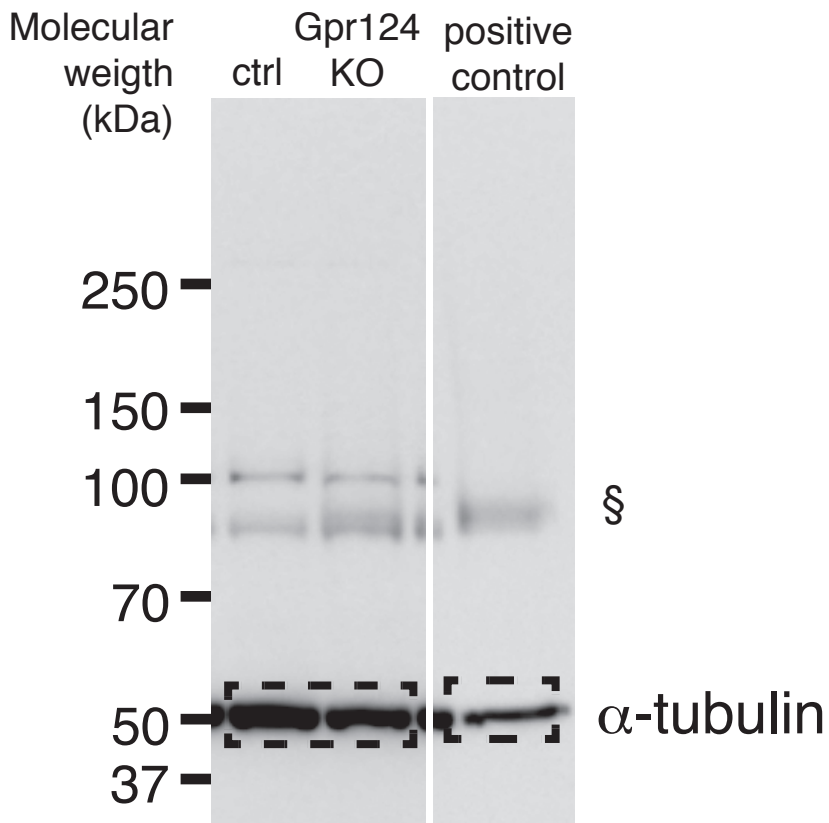

\* indicates a signal from the cut lower part of the membrane that was probed for  $\alpha$ -tubulin and exposed together with the HIF blot in the upper part of the membrane

# indicates a signal from the cut upper part of the membrane that was probed for HIF-1 $\alpha$  and exposed together with the  $\alpha$ -tubulin blot in the lower part of the membrane
